# Supplementary material for: Supplementation of Methyl-Donor Nutrients to a High-Fat, High-Sucrose Diet during Pregnancy and Lactation Normalizes Circulating 25-Dihydroxycholecalciferol Levels and Alleviates Inflammation in Offspring
Source: MDPI journal article supplement (doi:10.3390/metabo12121252), 2022-12-12
Supplement: s1 [file s1]

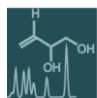

## Supplemental Figures and Tables

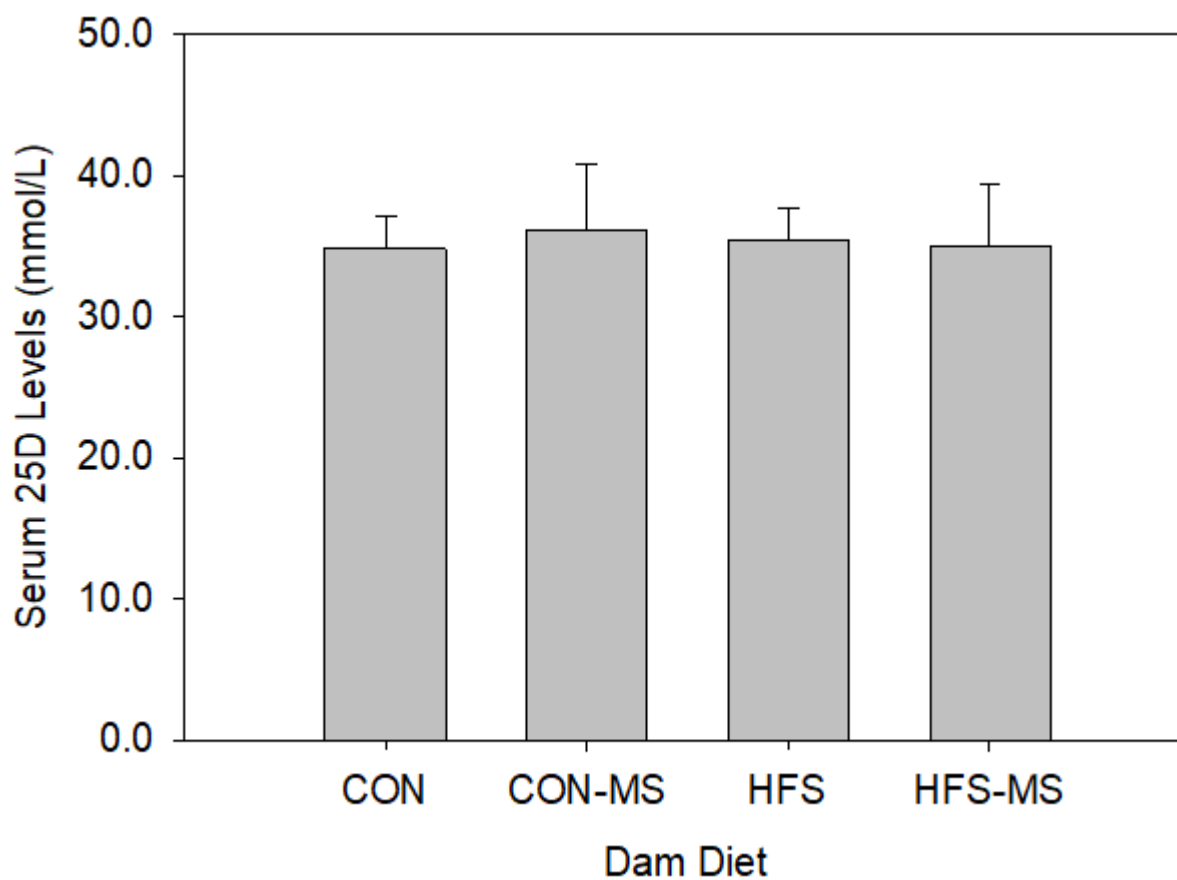

**Figure S1.** Circulating levels of 25-hydroxycholecalciferol (25D) in dams fed a control (CON) or high-fat high sucrose (HFS) diet supplemented with methyl-donor nutrients (MS). Data are expressed as mean  $\pm$  SEM ( $n = 4$ /group)

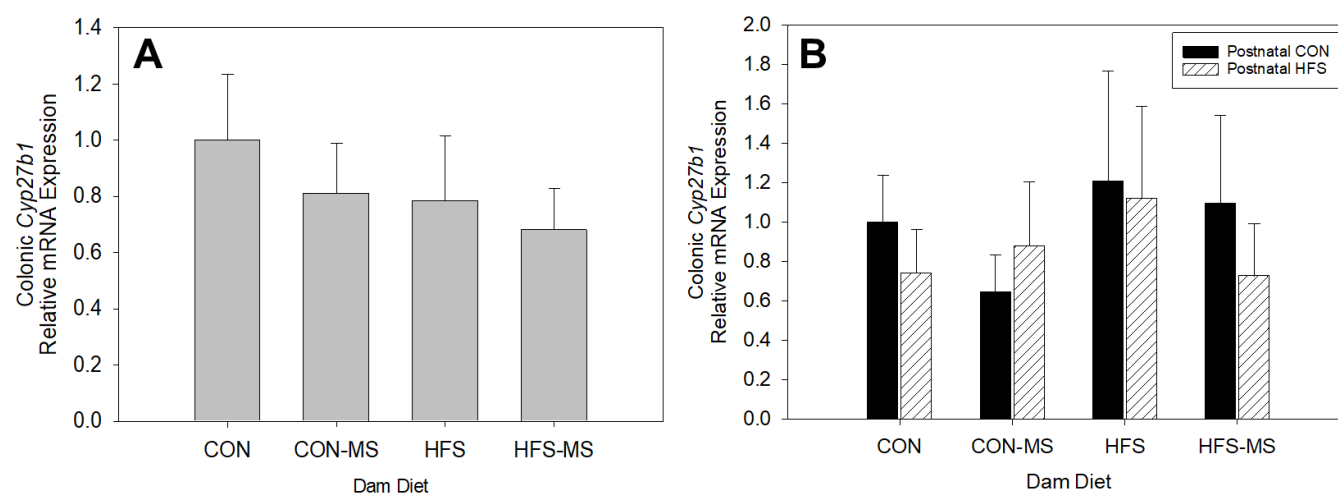

**Figure S2.** Relative mRNA expression of *Cyp27b1* in the colon of weanling (A) and adult pups (B) born to dams fed a control (CON) or high-fat high sucrose (HFS) diet with or without methyl-donor nutrients supplementation (MS). Data are normalized to GAPDH and expressed in relative to pups of CON dam (weanling) or pups of CON dams fed a postnatal CON diet (adult). All data are pooled from both genders. Different letters indicate statistical difference maternal diets at  $p < 0.05$ . Data are expressed as mean  $\pm$  SEM ( $n = 6 - 10$ /group). Postnatal CON, control postnatal diet; Postnatal HFS, high-fat high-sucrose postnatal diet

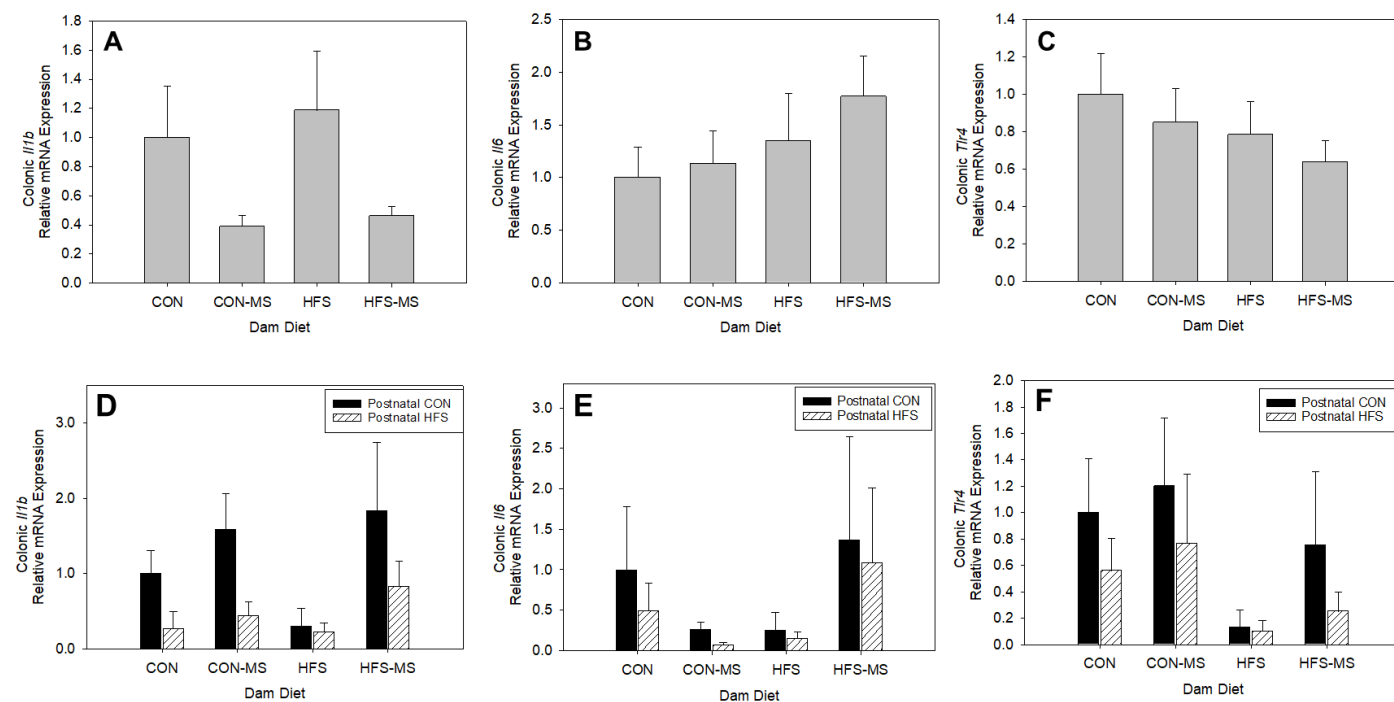

**Figure S3.** Relative mRNA expression of *Il1b* (A, D), *IL6* (B, E), and *TLR4* (C, F) in the colon of weanling (A, B, C) and adult pups (D, E, F) born to dams fed a control (CON) or high-fat high sucrose (HFS) diet with or without methyl-donor nutrients supplementation (MS). Data are normalized to GAPDH and expressed in relative to pups of CON dam (weanling) or pups of CON dams fed a postnatal CON diet (adult). All data are pooled from both genders. Different letters indicate statistical difference maternal diets at  $p < 0.05$ . Data are expressed as mean  $\pm$  SEM ( $n = 6 - 10/\text{group}$ ). Postnatal CON, control postnatal diet; Postnatal HFS, high-fat high-sucrose postnatal diet

**Table S1:** List of primers set for RT-PCR examined in this study.

| Primer                                | Forward (5' - 3')           | Reverse (5' - 3')              |
|---------------------------------------|-----------------------------|--------------------------------|
| <i>Gapdh</i>                          | GCA CAG TCA AGG CTG AGA AT  | TGA AGA CGC CAG TAG ACT CC     |
| <i>Vdr</i>                            | CCA TTC AGG ACC GCC TAT CC  | GTC GGC CAG TTT CTG GAT CA     |
| <i>Cyp27b1</i>                        | AAA GGT GTC TGT CCA GTC CA  | CTC ATA GAG TGC CCA GGA GA     |
| <i>Cathelicidin</i>                   | GGG TTG CCT CTA GCC GTT T   | TGA AGT CAT CCA CAG CAG CAC GG |
| <i>Il1β</i>                           | GCA CAG TTC CCC AAC TGG TA  | ACA CGG GTT CCA TGG TGA AG     |
| <i>Il6</i>                            | GTT GCC TTC TTG GGA CTG ATG | ATA CTG GTC TGT TGT GGG TGG T  |
| <i>Tlr4</i>                           | ACA GGG CAC AAG GAA GTA GC  | GTT CTC ACT GGG CCT TAG CC     |
| <i>Eubacteria (Universal)</i>         | ACT CCT ACG GGA GGC AGC AGT | ATT ACC GCG GCT GCT GGC        |
| <i>Bacteroides spp.</i>               | GGT TCT GAG AGG AGG TCC C   | CTG CCT CCC GTA GGA GT         |
| <i>E. rectale/ C. coccoides Group</i> | ACT CCT ACG GGA GGC AGC     | GCT TCT TAG TCA GGT ACC GTC A  |
| <i>Lactobacillus spp.</i>             | AGC AGT AGG GAA TCT TCC     | CAC CGC TAC ACA TGG A          |
